# Supplementary material
Source: publisher figshare collection journal article supplement (https://karger.figshare.com/ndownloader/files/23551448)
Supplement: Supplementary file 1 [file 23551448]

**Supplementary information**

**Supplementary Table 1.** Biomarkers for HF monitored in the REALIsM-HF study

| Biomarker | Pathomechanism | Rationale for use in both HFpEF and HFrEF | Rationale for use in HFpEF | Rationale for use in HFrEF |
| --- | --- | --- | --- | --- |
| hsTnT | Cardiomyocyte stress and leakage | hsTnT reflects acute and chronic cardiac pathologies such as ischemia and cardiac toxicity [1, 2] | Serum hsTnT level was associated with event rate in patients with HF [3] | hsTnT levels were higher in HFrEF than in HFpEF [4] |
| Gal-3 | (Cardiac) fibroblast /cardiomyocyte stress | Raised serum Gal-3 was a strong predictor of short-, mid-, and long-term mortality and HF-associated hospitalization in early- and late-stage HFpEF and HFrEF [5] |  |  |
| GDF15 | Cardiomyocyte stress | Very low levels of GDF15 were detectable in the healthy myocardium, but GD15 was induced following ischemic injury [6] | Raised plasma GDF15 levels distinguish patients with HFpEF from healthy individuals (AUC 0.94). The NTproBNP/GDF15 ratio had the greatest utility in distinguishing between HFpEF and HFrEF [4] | In early HF, elevated plasma GDF15 levels correlated strongly with indices of myocardial remodeling (LVMI, LVEDD, LVEF, LA diameter). In chronic HF, raised GDF15 levels predicted mortality [7, 8] |
| sST2 | Myocardial stress | In HF, expression of sST2 mRNA and protein was upregulated, and protein became detectable in serum [9] | In hypertensive patients, serum sST2 outperformed NTproBNP as an independent biomarker for the presence of HFpEF [10] | In severe chronic HF, increase in serum sST2 independently predicted mortality or transplantation [11] |
| NTproBNP | Pressure/volume overload | Integral part of AHA/ESC guidelines for the diagnosis of HF [12]. Levels on admission and at discharge carried important prognostic information in HFpEF and HFrEF, with low NTproBNP levels indicating very low risk of death. Used as a clinical endpoint in many clinical trials |  |  |
| hs-copeptin |  | Copeptin is secreted with vasopressin by the pituitary gland in a 1:1 stoichiometric ratio. Copeptin has a significantly longer half-life than biologically active vasopressin (several days vs minutes, respectively) and, thereby, is a surrogate biomarker for vasopressin [13] | Increased levels of copeptin were linked to excess mortality, and this link was maintained irrespective of the clinical signs of disease severity [14]. Copeptin was highly prognostic for 90-day adverse events in patients with acute HF [15] | Copeptin levels were significantly lower in HFpEF than in HFrEF. A 10 mL/min decline in glomerular filtration rate corresponded to a 17% increase in copeptin levels in patients with HFpEF [16] |
| IGFBP7 |  |  | Changes in IGFBP7 levels were significantly correlated with echocardiographic indicators of diastolic dysfunction and HFpEF [17] | Plasma IGFBP7 concentrations were associated with cardiac hypertrophy and prognostic for HF hospitalization and cardiovascular death [18] |

AHA, American Heart Association; AUC, area under the curve; ESC, European Society of Cardiology; Gal-3, galectin 3; GDF15, growth/differentiation factor 15; HF, heart failure; HFpEF, HF with preserved ejection fraction; HFrEF, HF with reduced ejection fraction; hs-copeptin, high-sensitivity copeptin; hsTnT, high-sensitivity troponin T; IGFBP7, insulin-like growth factor-binding protein 7; LA, left atrium; LVEDD, left ventricular end diastolic diameter; LVEF, left ventricular ejection fraction; LVMI, left ventricular mass index; mRNA, messenger ribonucleic acid; NTproBNP, N-terminal probrain natriuretic peptide; REALIsM-HF, Real-Life Multimarker Monitoring in Patients with Heart Failure; sST2, soluble suppression of tumorigenicity.

**Supplementary Figure legends**

**Supplementary Fig. 1.** Overview of the REALIsM-HF trial. 6MWD, 6-min walking distance; ePRO, electronic patient reported outcomes; HF, heart failure; QoL, quality of life; REALIsM-HF, Real-Life Multimarker Monitoring in Patients with Heart Failure.

**ReferencesReferences**

1 Feng J, Schaus BJ, Fallavollita JA, Lee TC, and Canty JM, Jr. Preload induces troponin I degradation independently of myocardial ischemia. Circulation. 2001;103(16):2035–7.

2 Cardinale D, Colombo A, Sandri MT, Lamantia G, Colombo N, Civelli M, et al. Prevention of high-dose chemotherapy-induced cardiotoxicity in high-risk patients by angiotensin-converting enzyme inhibition. Circulation. 2006;114(23):2474–81.

3 Latini R, Masson S, Anand IS, Missov E, Carlson M, Vago T, et al. Prognostic value of very low plasma concentrations of troponin T in patients with stable chronic heart failure. Circulation. 2007;116(11):1242–9.

4 Santhanakrishnan R, Chong JP, Ng TP, Ling LH, Sim D, Leong KT, et al. Growth differentiation factor 15, ST2, high-sensitivity troponin T, and N-terminal pro brain natriuretic peptide in heart failure with preserved vs. reduced ejection fraction. Eur J Heart Fail. 2012;14(12):1338–47.

5 Kramer F. Galectin-3: clinical utility and prognostic value in patients with heart failure. Res Rep Clin Cardiol. 2013;4:13–22.

6 Kempf T, Eden M, Strelau J, Naguib M, Willenbockel C, Tongers J, et al. The transforming growth factor-beta superfamily member growth-differentiation factor-15 protects the heart from ischemia/reperfusion injury. Circ Res. 2006;98(3):351–60.

7 Wang F, Guo Y, Yu H, Zheng L, Mi L, and Gao W. Growth differentiation factor 15 in different stages of heart failure: potential screening implications. Biomarkers. 2010;15(8):671–6.

8 Kempf T, von Haehling S, Peter T, Allhoff T, Cicoira M, Doehner W, et al. Prognostic utility of growth differentiation factor-15 in patients with chronic heart failure. J Am Coll Cardiol. 2007;50(11):1054–60.

9 Weinberg EO, Shimpo M, Hurwitz S, Tominaga S, Rouleau JL, and Lee RT. Identification of serum soluble ST2 receptor as a novel heart failure biomarker. Circulation. 2003;107(5):721–6.

10 Wang YC, Yu CC, Chiu FC, Tsai CT, Lai LP, Hwang JJ, et al. Soluble ST2 as a biomarker for detecting stable heart failure with a normal ejection fraction in hypertensive patients. J Card Fail. 2013;19(3):163–8.

11 Ky B, French B, McCloskey K, Rame JE, McIntosh E, Shahi P, et al. High-sensitivity ST2 for prediction of adverse outcomes in chronic heart failure. Circ Heart Fail. 2011;4(2):180–7.

12 Maisel AS, Krishnaswamy P, Nowak RM, McCord J, Hollander JE, Duc P, et al. Rapid measurement of B-type natriuretic peptide in the emergency diagnosis of heart failure. N Engl J Med. 2002;347(3):161–7.

13 Lasota B and Mizia-Stec K. Copeptin in heart failure. Res Rep Clin Cardiol. 2014;5:133–144.

14 Neuhold S, Huelsmann M, Strunk G, Stoiser B, Struck J, Morgenthaler NG, et al. Comparison of copeptin, B-type natriuretic peptide, and amino-terminal pro-B-type natriuretic peptide in patients with chronic heart failure: prediction of death at different stages of the disease. J Am Coll Cardiol. 2008;52(4):266–272.

15 Maisel A, Xue Y, Shah K, Mueller C, Nowak R, Peacock WF, et al. Increased 90-day mortality in patients with acute heart failure with elevated copeptin: secondary results from the Biomarkers in Acute Heart Failure (BACH) study. Circ Heart Fail. 2011;4(5):613–20.

16 Loncar G, von Haehling S, Tahirovic E, Inkrot S, Mende M, Sekularac N, et al. Effect of beta blockade on natriuretic peptides and copeptin in elderly patients with heart failure and preserved or reduced ejection fraction: results from the CIBIS-ELD trial. Clin Biochem. 2012;45(1-2):117–22.

17 Barroso MC, Kramer F, Greene SJ, Scheyer D, Köhler T, Karoff M, et al. Serum insulin-like growth factor-1 and its binding protein-7: potential novel biomarkers for heart failure with preserved ejection fraction. BMC Cardiovasc Disord. 2016;16(1):199.

18 Chugh S, Ouzounian M, Lu Z, Mohamed S, Li W, Bousette N, et al. Pilot study identifying myosin heavy chain 7, desmin, insulin-like growth factor 7, and annexin A2 as circulating biomarkers of human heart failure. Proteomics. 2013;13(15):2324–34.
